# Supplementary material
Source: MDPI journal article supplement (https://www.mdpi.com/2673-9992/14/1/120)
Supplement: s1 [file s1]

Archive with 1 entries (1 files):
- msf-2138530-supplementary.pdf
